# Supplementary material
Source: PubMed Central journal article supplement (PMC4805081)

**SUPPLEMENTARY MATERIAL**

**Improved Proteostasis in the Secretory Pathway Rescues Alzheimer's Disease in the Mouse**

**Yajing Peng, Mi Jin Kim, Rikki Hullinger, Kenneth J. O'Riordan, Corinna Burger, Mariana Pehar, Luigi Puglielli**

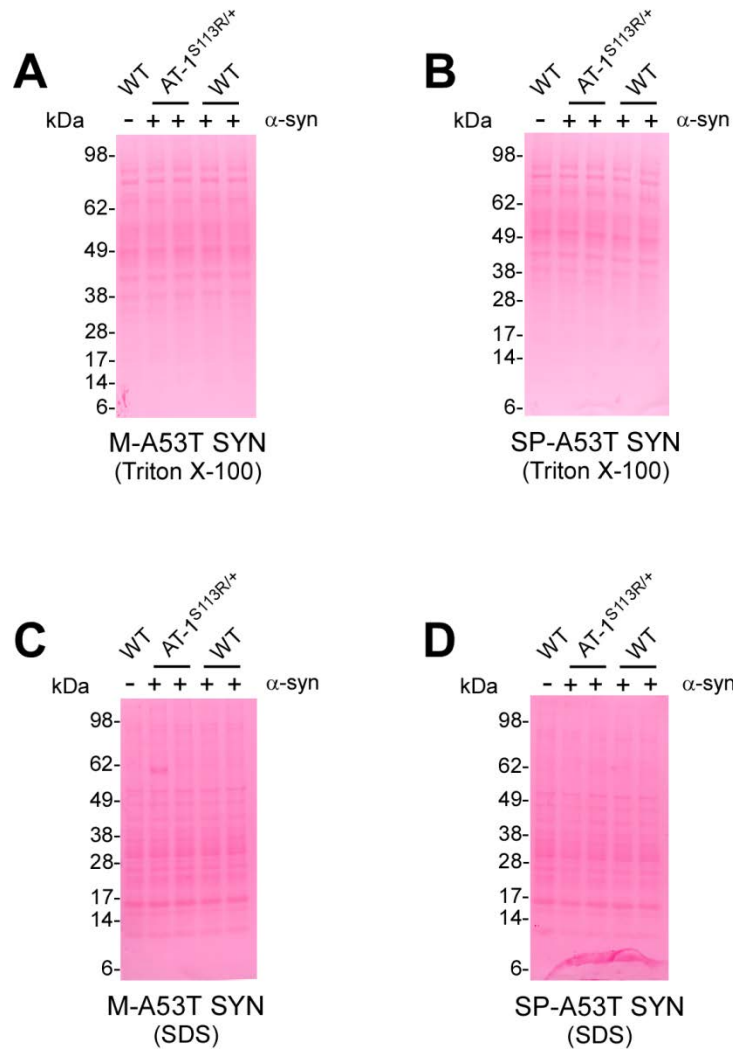

**Supplementary Figure 1. Loading controls for Fig. 1, B-E.**

(A-D) Mouse embryo fibroblasts (MEFs) from wild-type (WT) and AT-1<sup>S113R/+</sup> mice were transfected with a mutant pro-aggregating version of  $\alpha$ -synuclein (A53T syn) associated with Parkinson's disease. Loading controls (Ponceau Red staining) for soluble (Triton X-100) and insoluble/aggregated (SDS) extractions are shown.

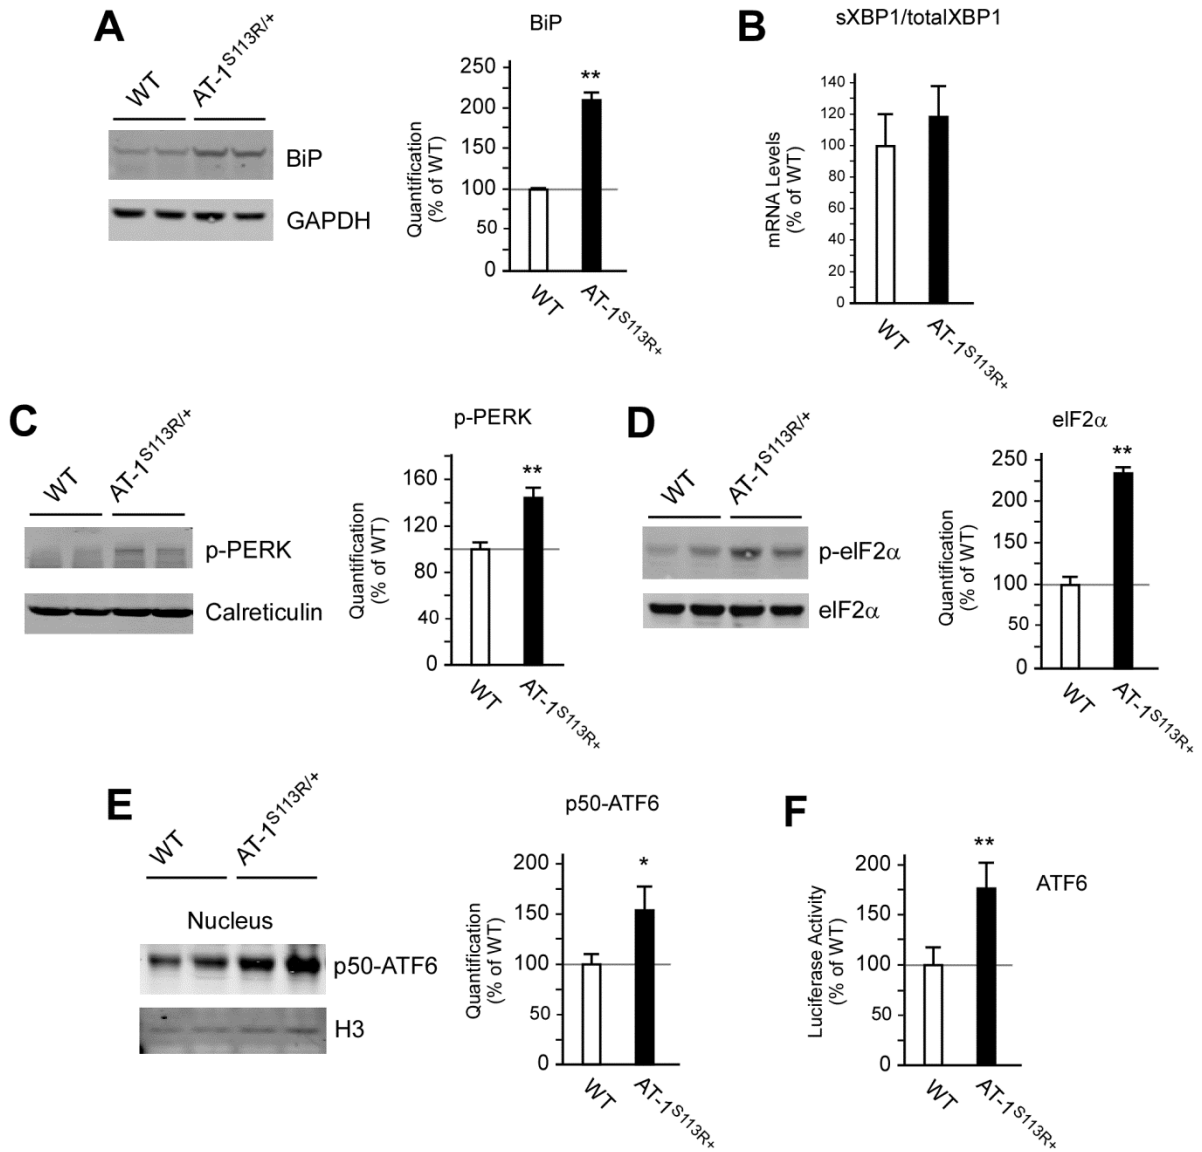

**Supplementary Figure 2. AT-1<sup>S113R/+</sup> mice display general activation of the UPR.**

- (A) Western blot determination of BiP.
- (B) Real-time quantitation of sXBP1 and totalXBP1 mRNA levels.
- (C) Western blot determination of p-PERK.
- (D) Western blot determination of eIF2α.
- (E) Western blot determination of p50-ATF6.
- (F) Luciferase activity of ATF6 following transfection in MEF.

Due to the unique characteristics of the tissue, (A-E) were performed in liver. Values are mean ± SD. \*, p<0.05; \*\* p<0.005.

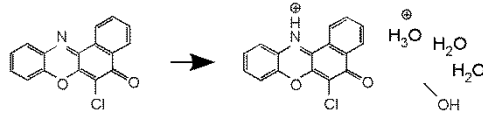

Chemical Formula:  $C_{17}H_{20}ClNO_6^{2+}$   
 Exact Mass (predicted): 369.10  
 Exact Mass (measured): 369.4  
 Molecular Weight: 369.80

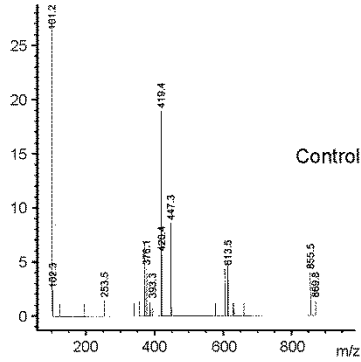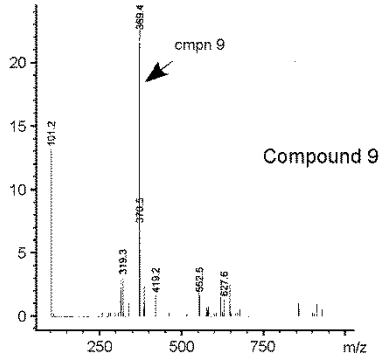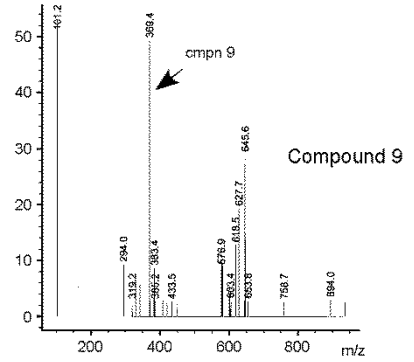

**Supplementary Figure 3. Compound 9 is found in the CSF.**

Mass spectrometry determination of compound 9 in the cerebrospinal fluid of WT mice fed control or compound 9 diets. One control- and two compound 9-treated animals are shown.

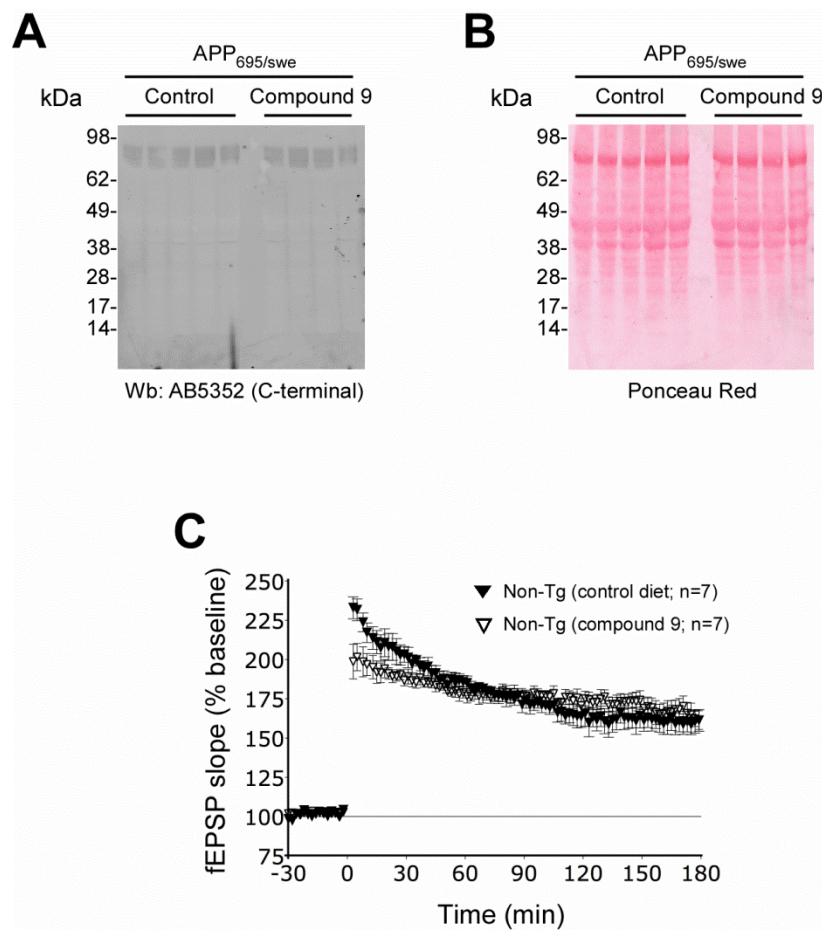

**Supplementary Figure 4. Loading controls for Fig. 6A and LTP of Non-Tg mice.**

- (A) Blot shown in Fig. 6A was probed with an antibody against the C-terminus of APP to confirm that bands shown in Fig. 6A are not C-terminal membrane-bound fragments of APP.
- (B) Loading control for the same blot.
- (C) LTP induction in hippocampal slices of Non-Tg mice. Values are mean  $\pm$  SD.

**A**

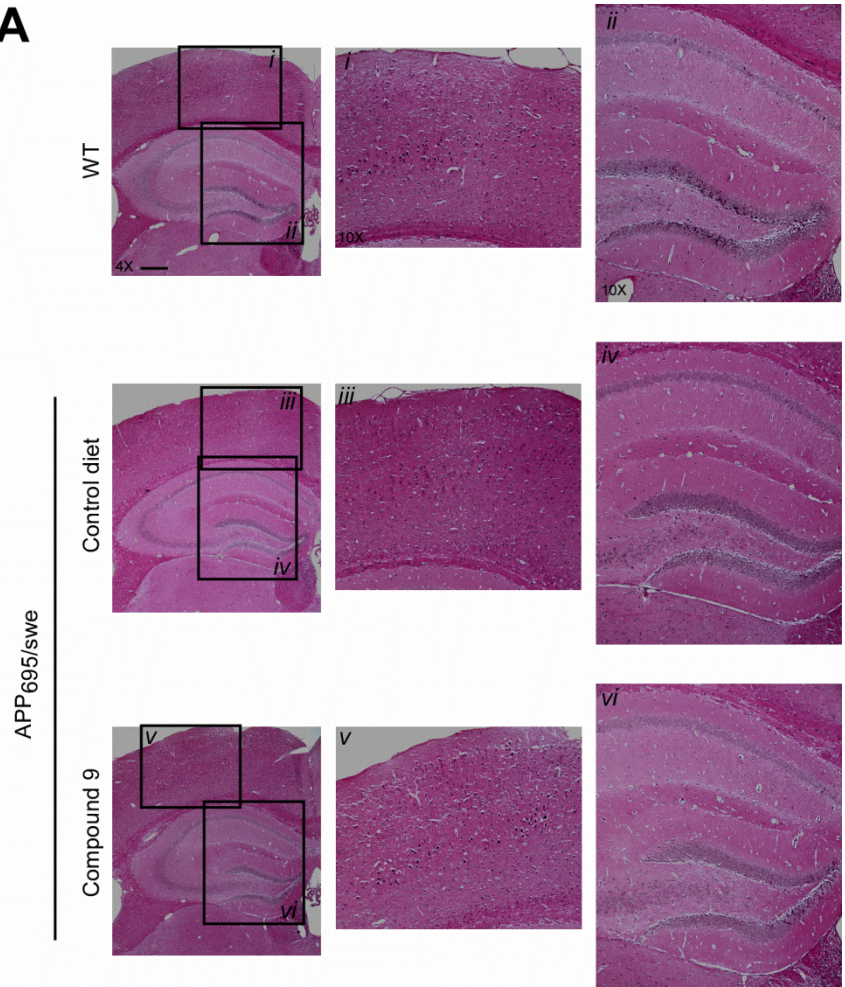

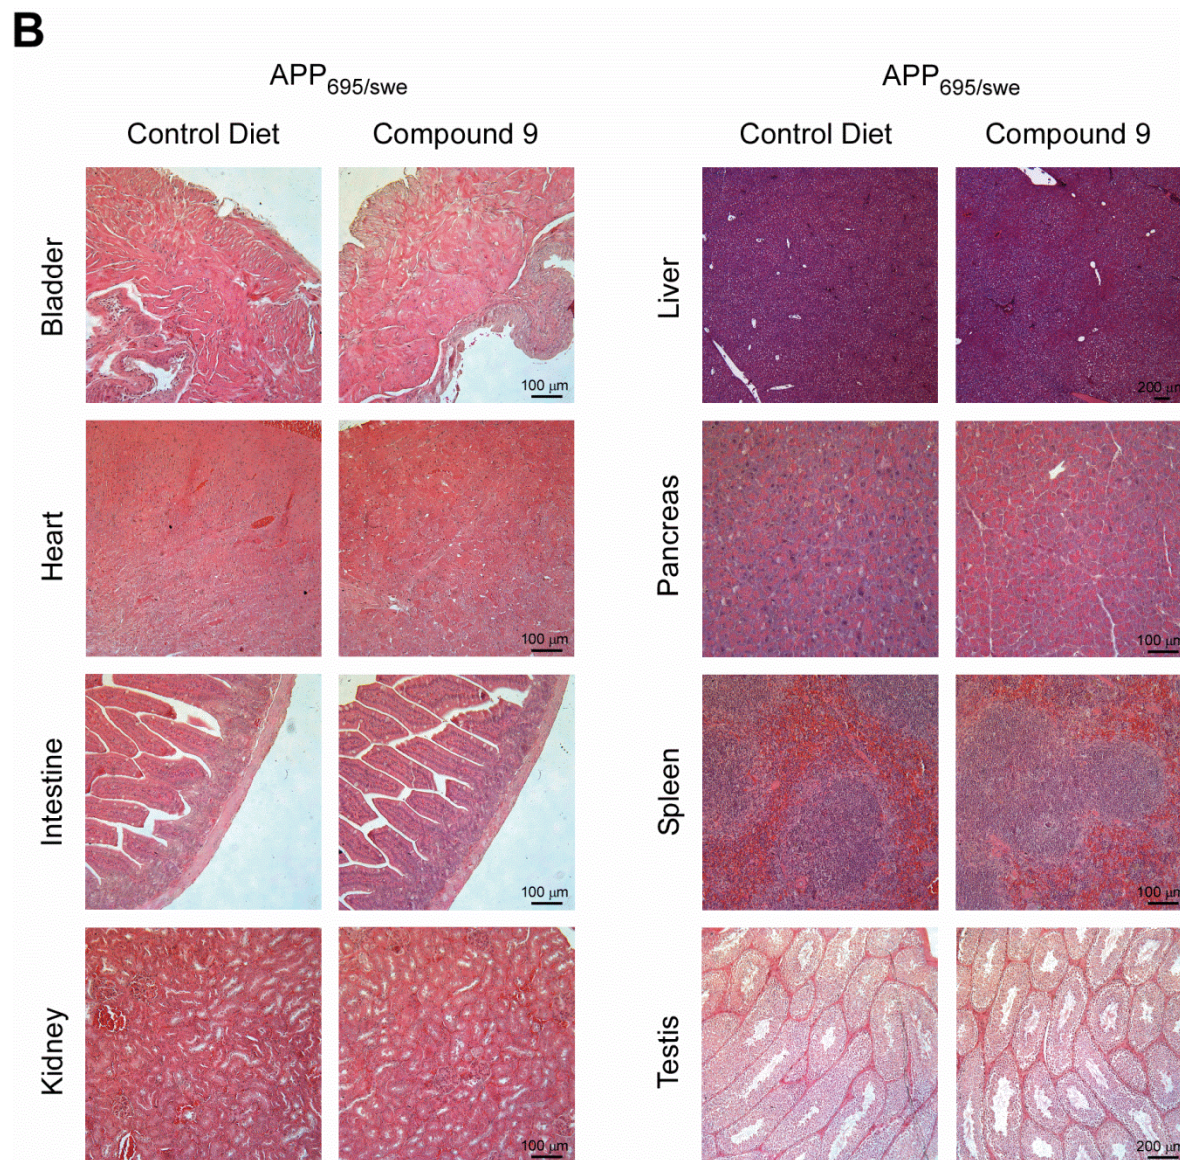

**Supplementary Figure 5. Central and peripheral tissues in compound 9-treated mice appear normal.**

- (A) H&E staining of the brain of the indicated animals show no significant differences.
- (B) H&E staining of peripheral tissues in compound 9-treated animals show no evident signs of toxicity.

### Supplementary Table 1. Drug-likeness properties of compound 9 and 19.

|                         | Compound 9                                                                        | Compound 19                                                                        | Lipinski's rule<br>(modified *) |
|-------------------------|-----------------------------------------------------------------------------------|------------------------------------------------------------------------------------|---------------------------------|
|                         | 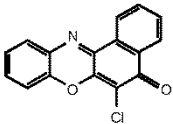 |  |                                 |
| Hydrogen bond donors:   | 0                                                                                 | 1                                                                                  | <5                              |
| Hydrogen bond acceptor: | 3                                                                                 | 4                                                                                  | <10                             |
| MW:                     | 281.698                                                                           | 327.767                                                                            | 160 to 480 Da                   |
| cLogP:                  | +3.71                                                                             | +2.53                                                                              | -0.4 to +5.6                    |

\* McFarland, J.W., *et al.* J Med Chem 1997; 40:1340-1346.  
 Ghose, A.K., *et al.* J Comb Chem 1999; 1:55-68.  
 Lipinski, C.A., *et al.* Adv Drug Deliv Rev 2001; 46:3-26.



## Supplementary Table 2. Solubility of compound 9 and 19.

|                       | Solubility (mg/ml) |             |
|-----------------------|--------------------|-------------|
|                       | Compound 9         | Compound 19 |
| 0.1 M HCl             | Not Detected       | 0.0004      |
| Citrate Buffer pH=4   | Not Detected       | 0.0004      |
| Phosphate Buffer pH=7 | Not Detected       | 0.0003      |
| PEG 400               | 0.58               | 4.7         |
| Transcutol HP         | 2.4                | 7.9         |
| Ethanol               | 0.32               | 2.2         |

**Supplementary Table 3. Diet composition (BioServ #F0078).**

|               |       |                  |              |
|---------------|-------|------------------|--------------|
| Crude Protein | 18.7% | Caloric Profile: |              |
| Fat           | 5.6%  | Protein          | 0.75 kcal/gm |
| Fibers        | 4.7%  | Fat              | 0.50 kcal/gm |
| Ash           | 6.5%  | Carbohydrate     | 2.36 kcal/gm |
| Moisture      | <10%  | <hr/>            |              |
| Carbohydrate  | 59.1% | Total            | 3.60 kcal/gm |

**ORIGINAL GELS**

**Improved Proteostasis in the Secretory Pathway Rescues Alzheimer's Disease in the Mouse**

**Yajing Peng, Mi Jin Kim, Rikki Hullinger, Kenneth J. O'Riordan, Corinna Burger, Mariana Pehar, Luigi Puglielli**

Figure 1A

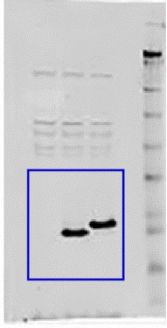

Figure 1A

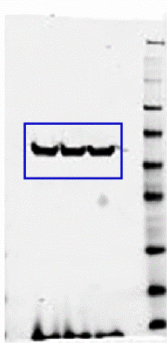

Figure 1B

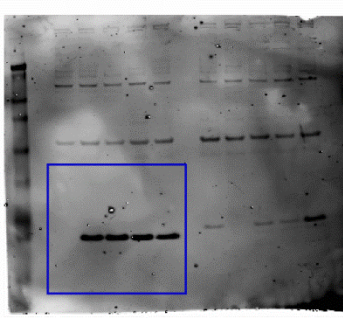

Figure 1C

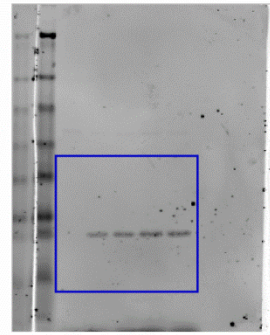

Figure 1D

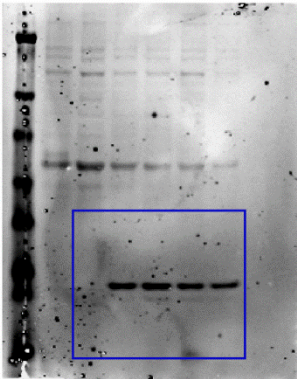

Figure 1E

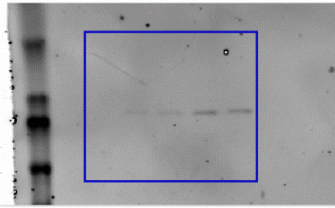

Figure 2D

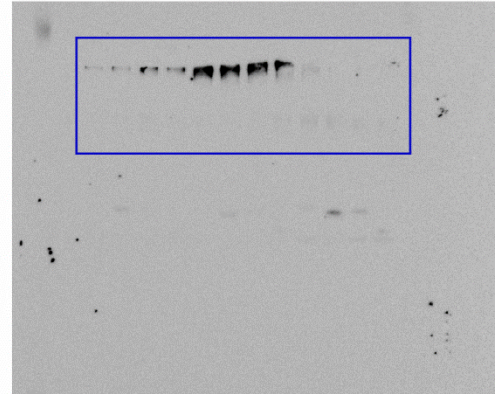

Figure 1G

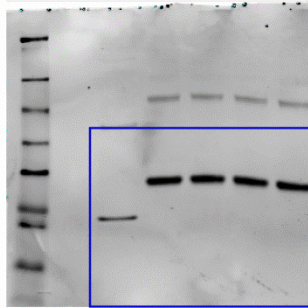

Figure 2D

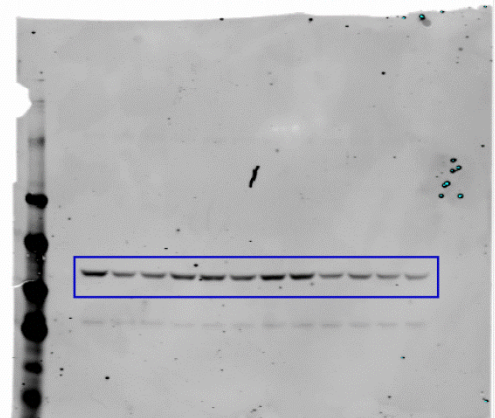

Figure 1J

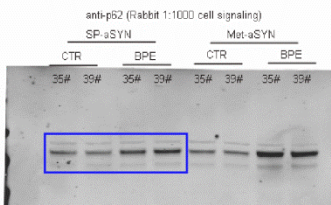

Figure 1J

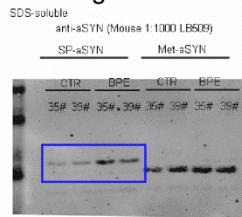

Figure 1J

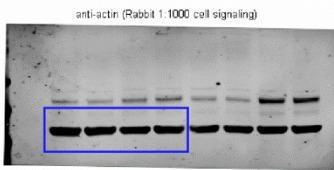

Figure 3D

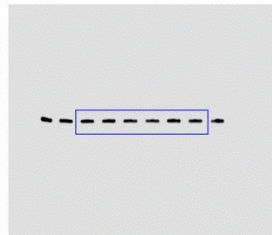

Figure 3D

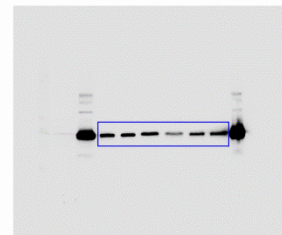

Figure 4C

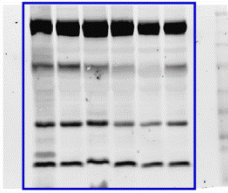

Figure 4F

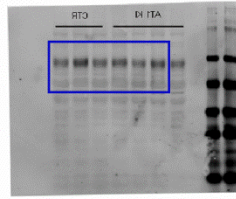

Figure 4F

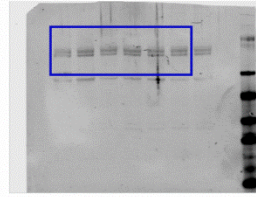

Figure 4F

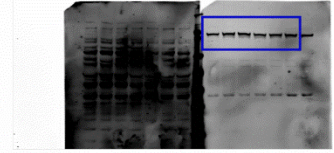

Figure 4F

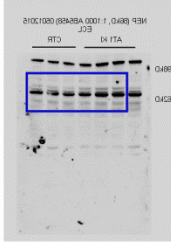

Figure 4F

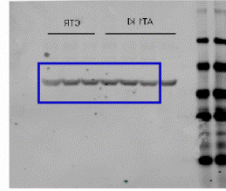

Figure 4F

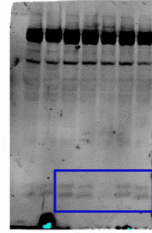

Figure 4F

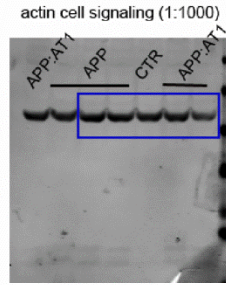

Figure 5B

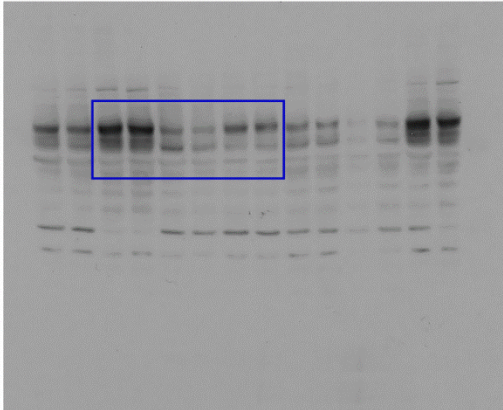

Figure 5B

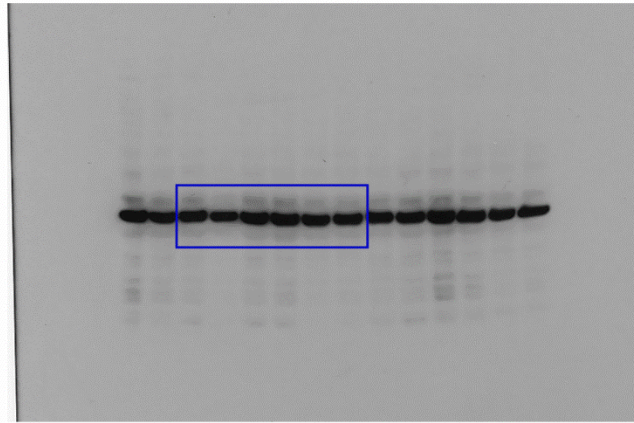

Figure 5D

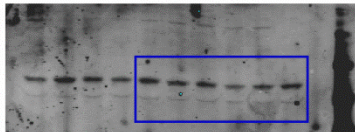

Figure 5D

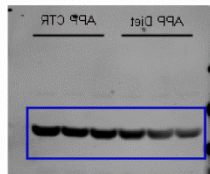

Figure 5G

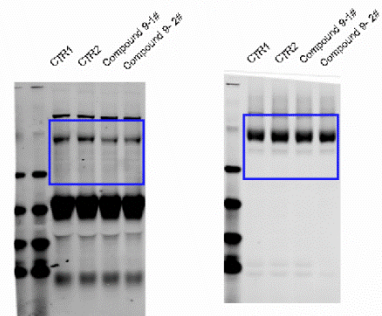

Figure 5D

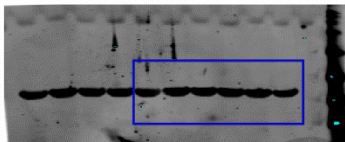

Figure 5D

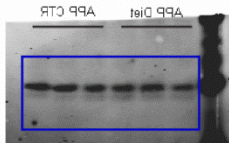

Figure 6A

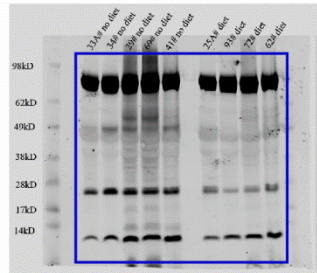

Figure 7C

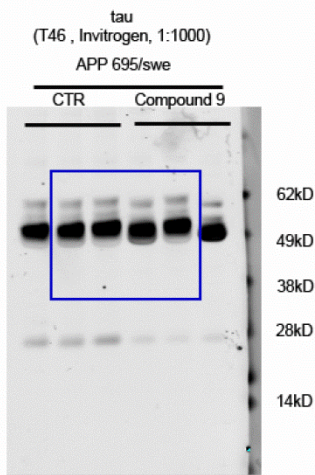

Figure 7C

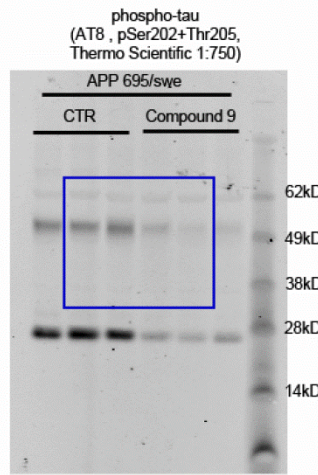

Figure 7C

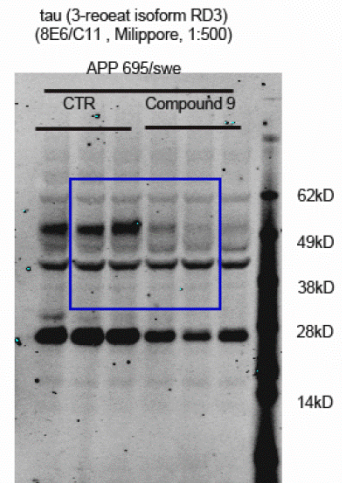

Figure 7C

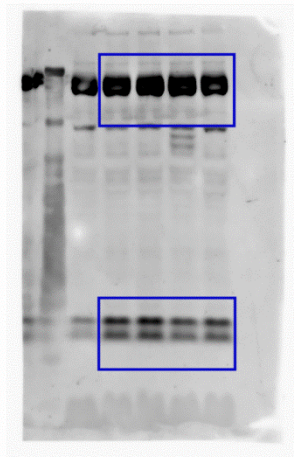

Supplement: c527e9c6c05617a832089e23e9c4f4b1_brain-2015-01310-File009.pdf [file c527e9c6c05617a832089e23e9c4f4b1_brain-2015-01310-File009.pdf]
